# Supplementary material
Source: Research Square preprint supplement (doi:10.21203/rs.3.rs-10399218/v1)
Supplement: Supplementary file 1 [file c438aa568cc2cbbf0409d1d8.xlsx]

## Sheet: Sheet1
	Table S1. Data derivation for 12 jurisdictions with auditable sanction records.
	Country	Top-cap programme	[Cap] Source	[Cap] Derivation	E[P] Source	E[P] Derivation	Exchange Rate (¥ per unit)
	Germany	Heisenberg/Emmy Noether (DFG)	DFG Jahresbericht 2023	€150–300k/yr ×5 yr → median €225k → ¥9.6e5 (PPP)	DFG Jahresbericht Forschungsintegrität 2022	€124k avg recovery + 20% penalty + criminal referral (5 yr) → ¥8.0e5	8.0 per €
	Switzerland	SNF Project + Prof-grade	SNF annual report 2023	CHF 200–400k/yr ×4 yr → median CHF 300k → ¥1.4e6	SNF misconduct records 2023	CHF 110k avg recovery + public listing → ¥6.0e5	8.0 per CHF
	Israel	ISF large PI	ISF grant data 2022	ILS 500k–1M/yr ×5 yr → median ILS 750k → ¥9.0e5	ISF integrity reports 2022	ILS 650k avg recovery + public listing → ¥7.0e5	2.0 per ILS
	USA	NSF CAREER / NIH R01 PI	NSF FY23 budget	$500k–1M/yr ×5 yr → median $750k → ¥7.0e5	ORI Handbook 2023 + DOJ data	Median: 5-yr ban + rare DOJ fine ($0–500k) → ¥2.0e5	7.0 per USD
	Netherlands	Spinoza / VICI (NWO)	NWO annual report 2023	€1.5M/5yr + matching → median €1.8M → ¥1.2e6	LOWI Annual Report 2024	€80k avg recovery + public listing (no criminal) → ¥3.0e5	8.0 per €
	UK	UKRI FLF / EPSRC large	UKRI funding data 2023	£1.2M/5yr → median £1.2M → ¥1.1e6	UKRI misconduct statistics 2023	£80k avg recovery + public listing (no criminal) → ¥1.1e5	9.0 per £
	Canada	NSERC + CRC	NSERC annual report 2023	C$200k/yr ×5 yr + matching → median C$250k → ¥1.0e6	NSERC integrity records 2023	C$70k avg recovery + public listing → ¥1.0e5	5.5 per CAD
	Australia	ARC Future Fellowship	ARC annual report 2023	A$140k/yr ×4 yr + matching → median A$180k → ¥1.3e6	ARC integrity reports 2023	A$85k avg recovery + public listing → ¥1.2e5	4.5 per AUD
	Singapore	NRF Investigatorship	NRF Singapore data 2023	S$1M/5yr + matching → median S$1.2M → ¥1.0e6	NUS/NTU internal data 2023	S$50k avg recovery + public listing → ¥8.0e4	5.0 per SGD
	South Korea	NRF BK21 / Chunmu	NRF Korea BK21 data 2023	₩300M/yr ×5 yr + matching → median ₩400M → ¥1.6e6	NRF Korea integrity reports 2023	₩60M avg recovery + public listing → ¥1.5e5	0.004 per ₩
	Japan	KAKEN Kiban-S + chair	JSPS KAKEN database 2023	¥50M/5yr + chair supplement → median ¥60M → ¥6.0e6	JSPS misconduct reports 2021–2024	¥3M avg recovery + public listing (no criminal) → ¥2.0e5	1.0 per JPY
	China	Changjiang / OY / Wanren	MoE Changjiang rules + NSFC	¥2M/3yr + 1:1–1:3 matching + PhD quota + admin → median ¥10M → ¥1.0e7	NSFC Huang case 2024 + supervisory notices	5-yr ban + zero clawback (principal-only in Huang) → ¥5.0e4 (opportunity cost proxy)	1.0 per CNY
	Country	Cap roster	w₁[Cap] (¥-PPP)	w₁ source	E[P] proxy	Clawback
	SE	VR SwecLife + SSF	1000000	VR Årsred 2023; SEK7.8→¥	ban-only (HS)	0
	DK	DFF Sapere Aude	1100000	DFF 2023; DKK5.5→¥	ban-only	0
	NO	RCN FRIPRO	1000000	RCN 2023; NOK4.6→¥	ban-only	0
	FI	Acad Finland Flag	900000	Acad Fi 2023; €7.8→¥	ban-only	0
	BE	FWO Excellence	1000000	FWO 2023; €7.8→¥	ban-only (VLIR)	0
	AT	FWF Wittgenstein	1200000	FWF 2023; €7.8→¥	ban-only	0
	IE	SFI PI	800000	SFI 2023; €7.8→¥	ban-only	0
	NZ	Marsden Council	400000	MBIE 2023; NZD4.5→¥	ban-only	0
	ES	AEI Severo Ochoa	700000	AEI 2023; €7.8→¥	ban-only	0
	IT	MIUR PRIN top	600000	MIUR 2023; €7.8→¥	ban-only	0
	CTW	MOST Yushan	800000	MOST 2023; TWD0.2→¥	ban-only	0
	Table S2. ND jurisdictions — cap-side proxy only
	Country	Cap-side proxy (¥-equiv)	E[P]	Note
	India	SERB large PI ≈ ₹30M/3yr → ¥2.5e5	ND	No public sanction records available
	Brazil	CNPq PQ ≈ R$200k/yr → ¥1.3e5	ND	No public sanction records; limited transparency
	Russia	RSF large PI → data unavailable post-2022	ND	Data inaccessible since 2022 conflict
	South Africa	NRF large → ZAR proxy ¥1.0e5	ND	No public sanction records
	Indonesia	BRIN + LPDP → ¥1.2e5	ND	No public sanction records
	Thailand	NRCT → ¥1.0e5	ND	No public sanction records
	Malaysia	FRGS + TRGS → ¥9.0e4	ND	No public sanction records
	Vietnam	NAFOSTED → ¥8.0e4	ND	No public sanction records
	Turkey	TÜBİTAK → ¥1.5e5	ND	Limited public data
	Argentina	CONICET → ¥1.0e5	ND	No public sanction records
	Chile	ANID FONDECYT → ¥9.0e4	ND	No public sanction records
	Colombia	MinCiencias → ¥8.0e4	ND	No public sanction records
	Nigeria	TETFund → ¥6.0e4	ND	No public sanction records
	Kenya	NRF-Kenya → ¥5.0e4	ND	No public sanction records
	Egypt	ASRT → ¥7.0e4	ND	No public sanction records
	Pakistan	HEC → ¥5.0e4	ND	No public sanction records
	Bangladesh	UGC → ¥4.0e4	ND	No public sanction records
	Philippines	DOST → ¥5.0e4	ND	No public sanction records
